# Supplementary material
Source: PubMed Central journal article supplement (PMC4674269)
Supplement: NIHMS741529-supplement-Supp_Fig_S1-S9___Table_S1-S4.pdf [file NIHMS741529-supplement-Supp_Fig_S1-S9___Table_S1-S4.pdf]

## **Supplementary Information**

**Induction of a quorum sensing pathway by environmental signals enhances group A streptococcal resistance to lysozyme.**

**Jennifer C. Chang, Juan Cristobal Jimenez, and Michael J. Federle**

.

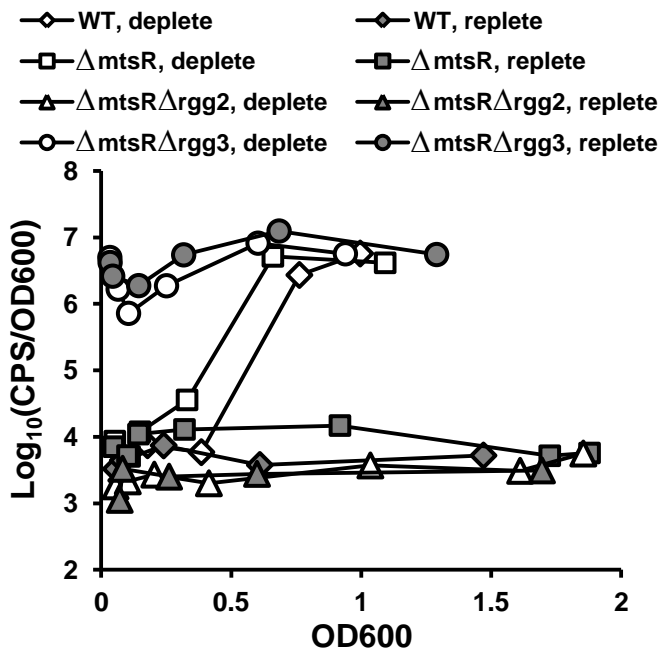

**Figure S1. Metal depletion induces Rgg-SHP quorum sensing.** Luciferase activity of wild-type NZ131 and isogenic  $P_{shp3}$ -*luxAB* reporter strains grown in metal-deplete or replete conditions. Cells were grown to mid-log in CDM+1% glucose, washed three times with CxCDM containing 100  $\mu$ M dipyriddy, then diluted into CxCDM supplemented with 50  $\mu$ M  $\text{CaCl}_2$  and 1000  $\mu$ M  $\text{MgSO}_4$  (deplete) or 50  $\mu$ M  $\text{CaCl}_2$ , 1000  $\mu$ M  $\text{MgSO}_4$ , 20  $\mu$ M  $\text{FeSO}_4$ , and 30  $\mu$ M  $\text{MnSO}_4$  (replete). Data are representative of experiments performed at least three times.

**A**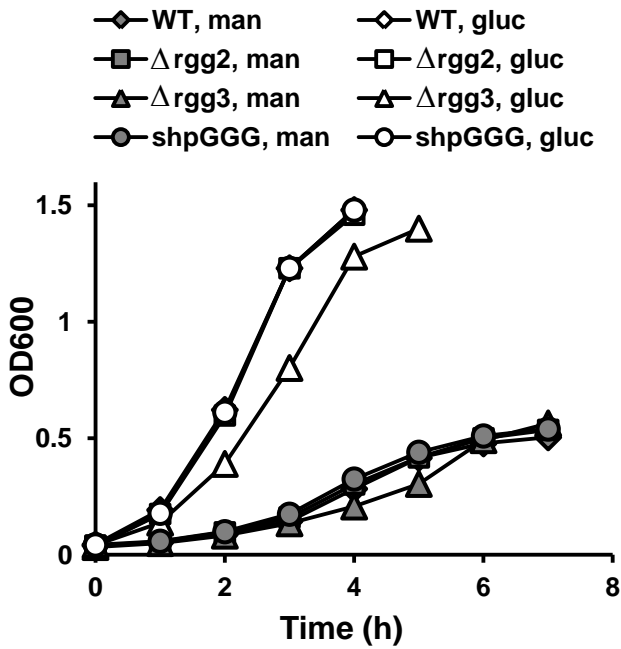**B**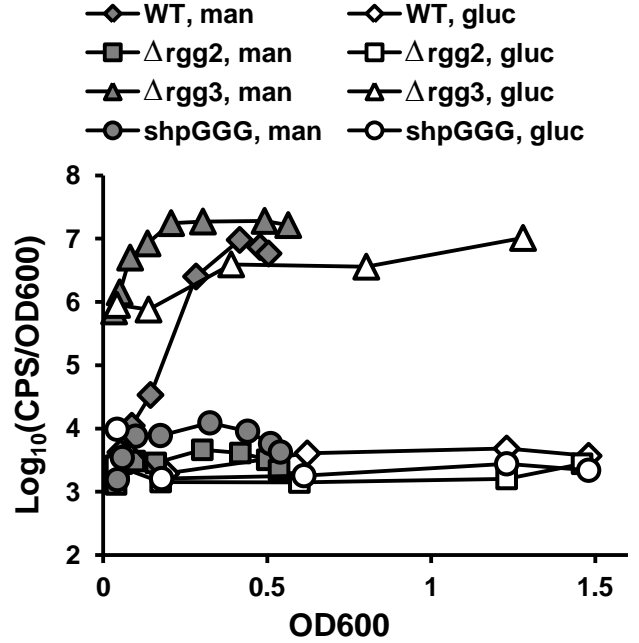

**Figure S2. Mannose-dependent induction of  $P_{shp3}$ -*luxAB* requires *rgg2* and *shps*.** (A) Growth or (B) luciferase activity from  $P_{shp3}$ -*lux* of WT,  $\Delta rgg2$ ,  $\Delta rgg3$ , and *shp*<sub>GGG</sub> strains grown in CDM with 1% mannose (man) or 1% glucose (gluc). Data shown are representative of experiments performed at least three times.

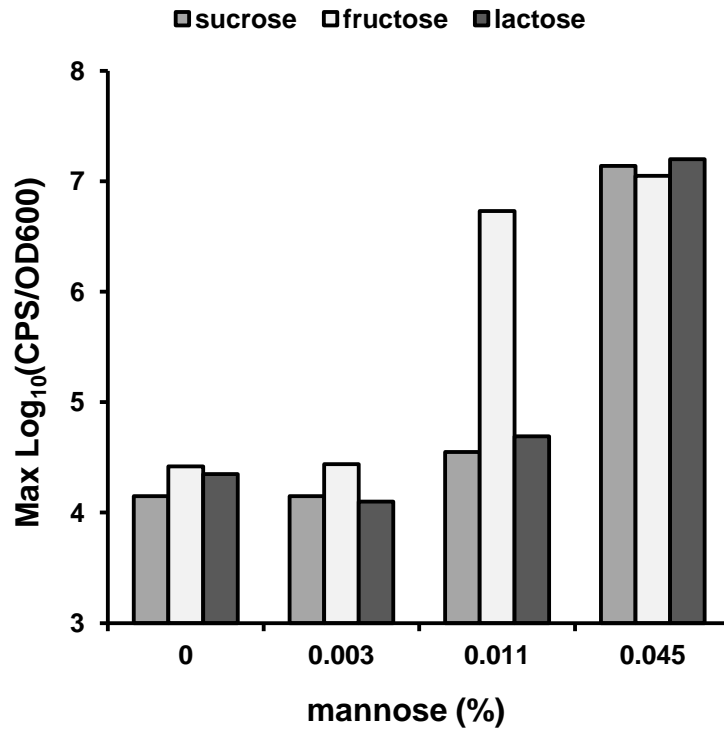

**Figure S3. Low concentrations of mannose are sufficient to induce QS when the primary carbon source is not glucose.**  $P_{shp3}$  reporter expression of a strain grown in CDM containing 1% sucrose (medium gray), 1% fructose (light gray) or 1% lactose (dark gray) with mannose supplementation as indicated.

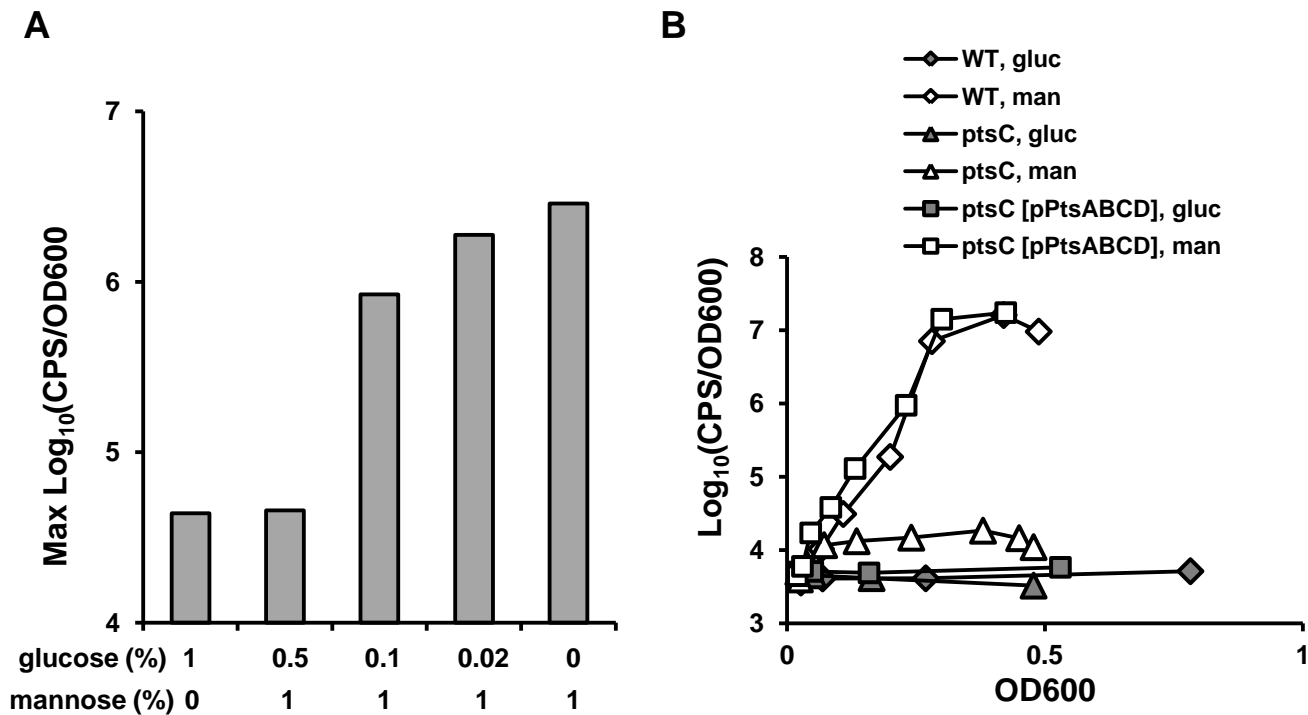

**Figure S4. The mannose response requires *ptsABCD* and is repressed by the carbon catabolite response. (A)** Luciferase expression from a  $P_{ptsA}$ -*luxAB* reporter strain grown in 1% mannose and decreasing concentrations of glucose. **(B)**  $P_{shp3}$ -*luxAB* expression in a *ptsC* complementation strain during growth in 1% glucose (gluc) or 1% mannose (man).

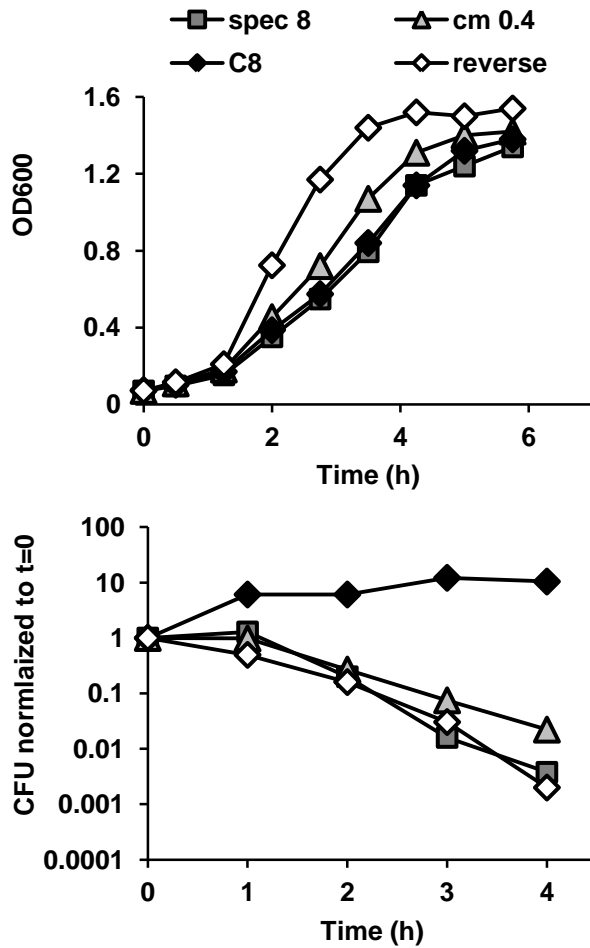

**Figure S5. Effect of artificially-slowed growth on lysozyme resistance.** Wild-type NZ131 grown in sub-inhibitory concentrations of the bacteriostatic antibiotics spectinomycin ( $8 \mu\text{g mL}^{-1}$ ) or chloramphenicol ( $0.4 \mu\text{g mL}^{-1}$ ) exhibits reduced growth rates similar to SHP-induced (C8) cultures (top panel) but does not exhibit increased survival after lysozyme challenge (bottom panel). Cells were grown with antibiotics or peptides for two hours before back-dilution into  $2 \text{ mg mL}^{-1}$  lysozyme. At each time point, an aliquot was removed, diluted and plated to enumerate CFUs.

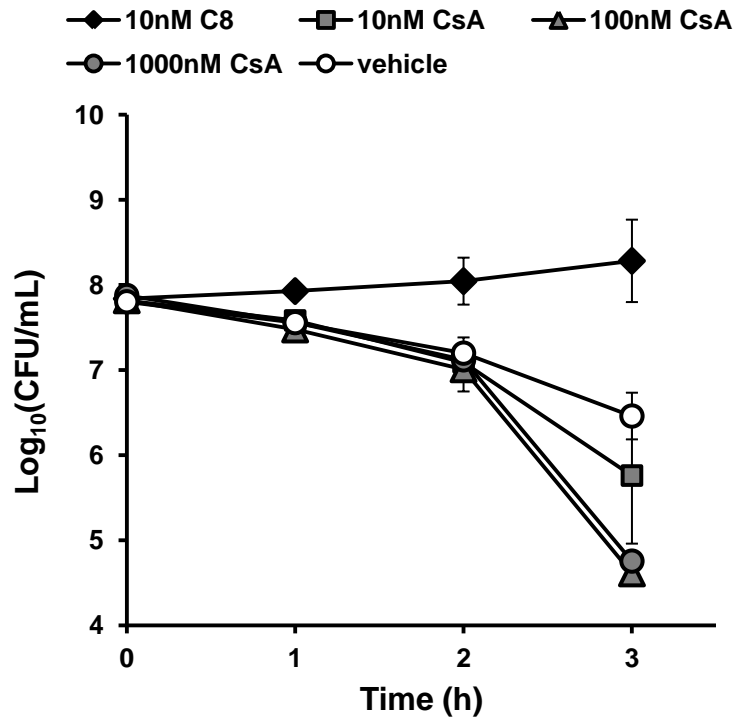

**Figure S6. Effect of high concentrations of CsA on resistance of NZ131 to  $2 \text{ mg mL}^{-1}$  lysozyme.** Cells were pre-treated with the drug for one hour at the concentrations indicated before lysozyme challenge.

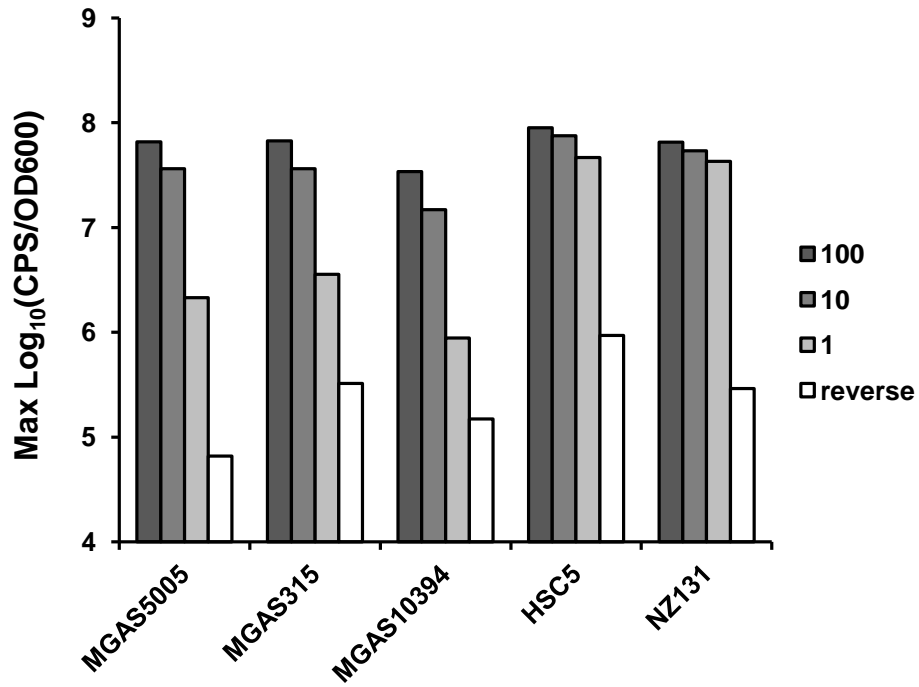

**Figure S7. Reporter induction in wild-type GAS strains in response to synthetic peptide.** Maximum  $P_{shp3}$ -*lux* reporter induction from different GAS serotypes exposed to 100, 10, or 1 nM synthetic SHP3-C8 or 100 nM reverse peptide.



**Figure S8. Reporter activity and lysozyme resistance of wild-type GAS grown in metal-deplete vs. replete CxCDM.** Wild-type GAS strains were grown in deplete or replete CxCDM, and growth (top panels) and luciferase activity of a multi-copy  $P_{shp3}$ -lux reporter (pJC229; middle panels) were monitored. After pre-growth in these conditions, cells were back-diluted into 10 (MGAS5005), 20 (MGAS10394 and HSC5), or 50 (MGAS315) mg mL<sup>-1</sup> lysozyme. At each time point, an aliquot was removed, diluted and plated to enumerate CFUs (bottom panels).

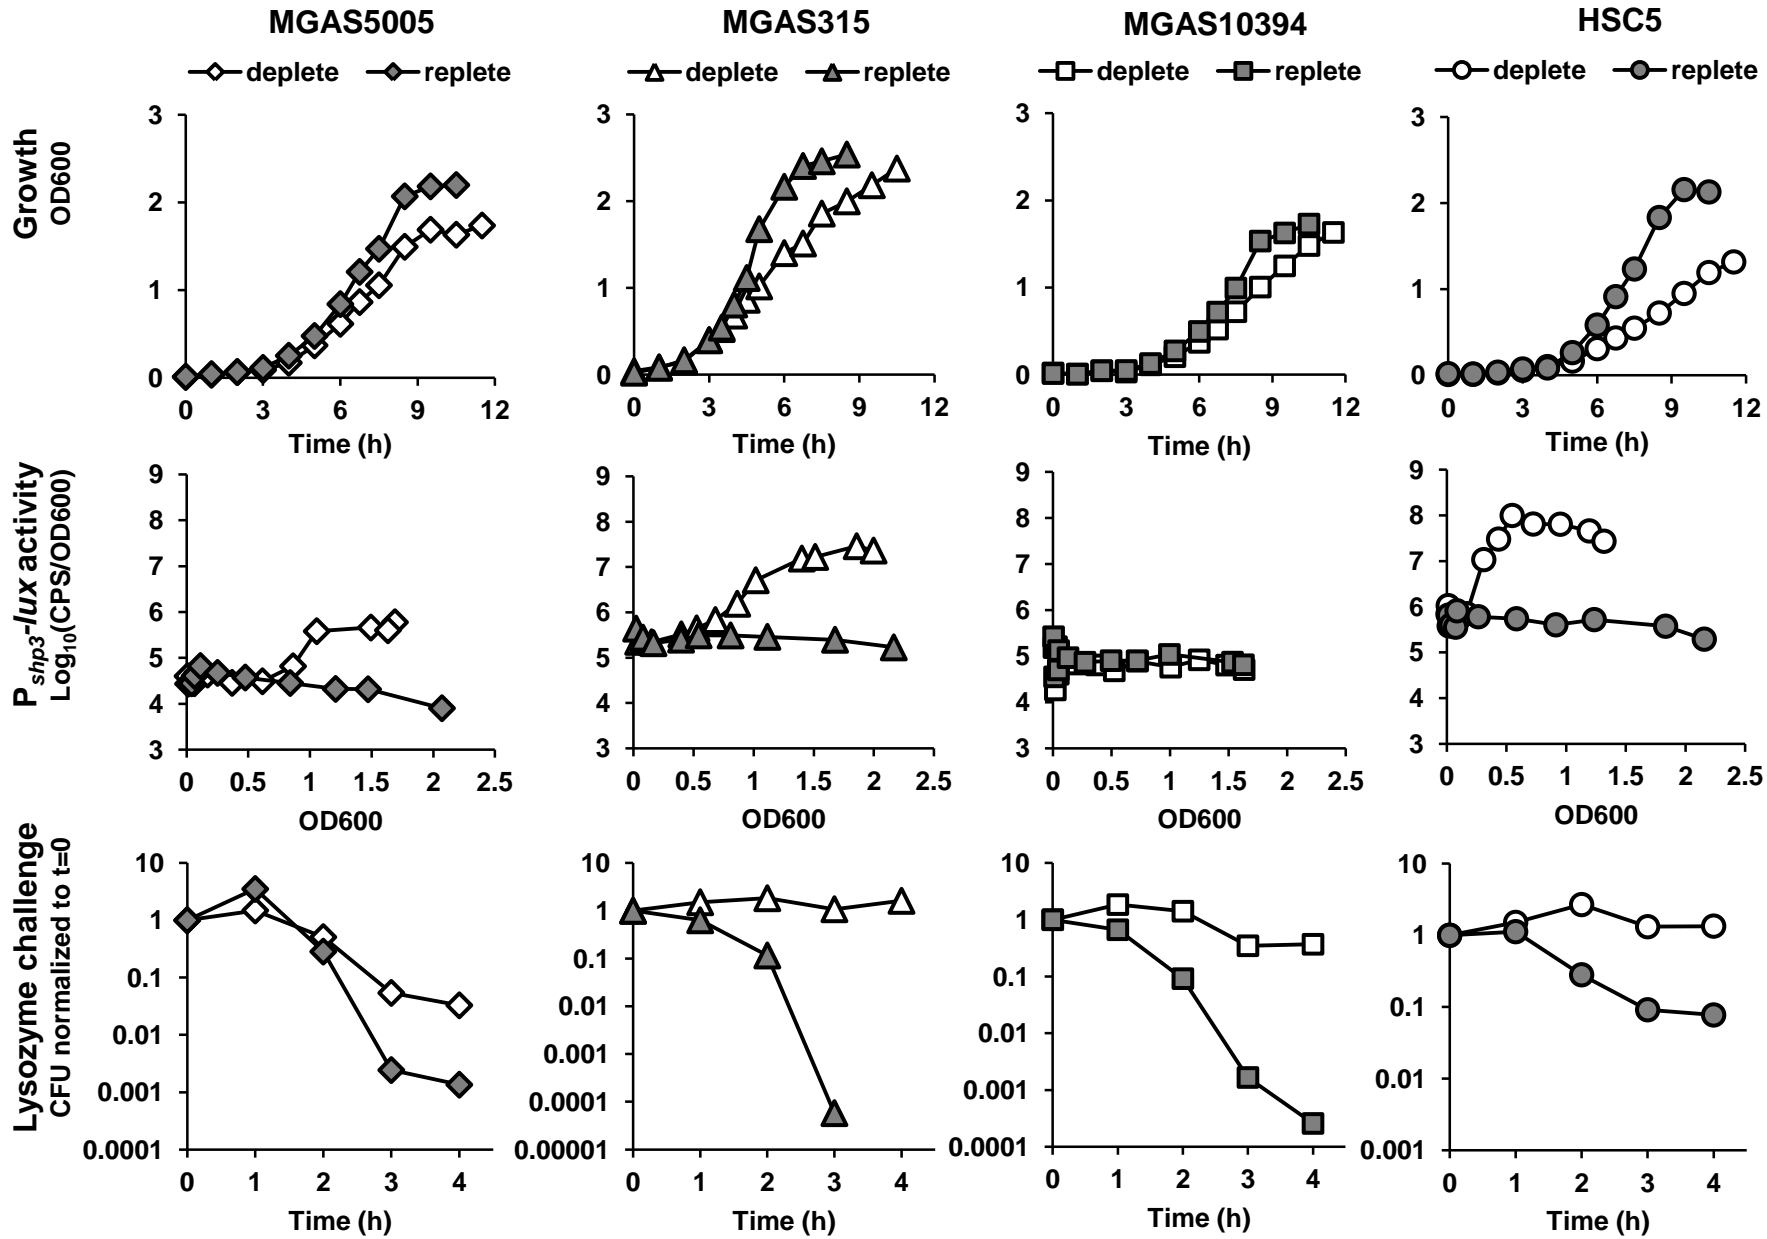

**Figure S9. Reporter activity and lysozyme resistance of wild-type GAS grown in mannose or glucose.** Wild-type GAS strains were grown in CDM containing 1% glucose or 1% mannose, and growth (top panels) and luciferase activity of a multi-copy  $P_{shp3}$ -*lux* reporter (pJC229; middle panels) were monitored. After pre-growth in these conditions, cells were back-diluted into 10 (MGAS5005), 20 (MGAS10394 and HSC5), or 50 (MGAS315) mg mL<sup>-1</sup> lysozyme. At each time point, an aliquot was removed, diluted and plated to enumerate CFUs (bottom panels).

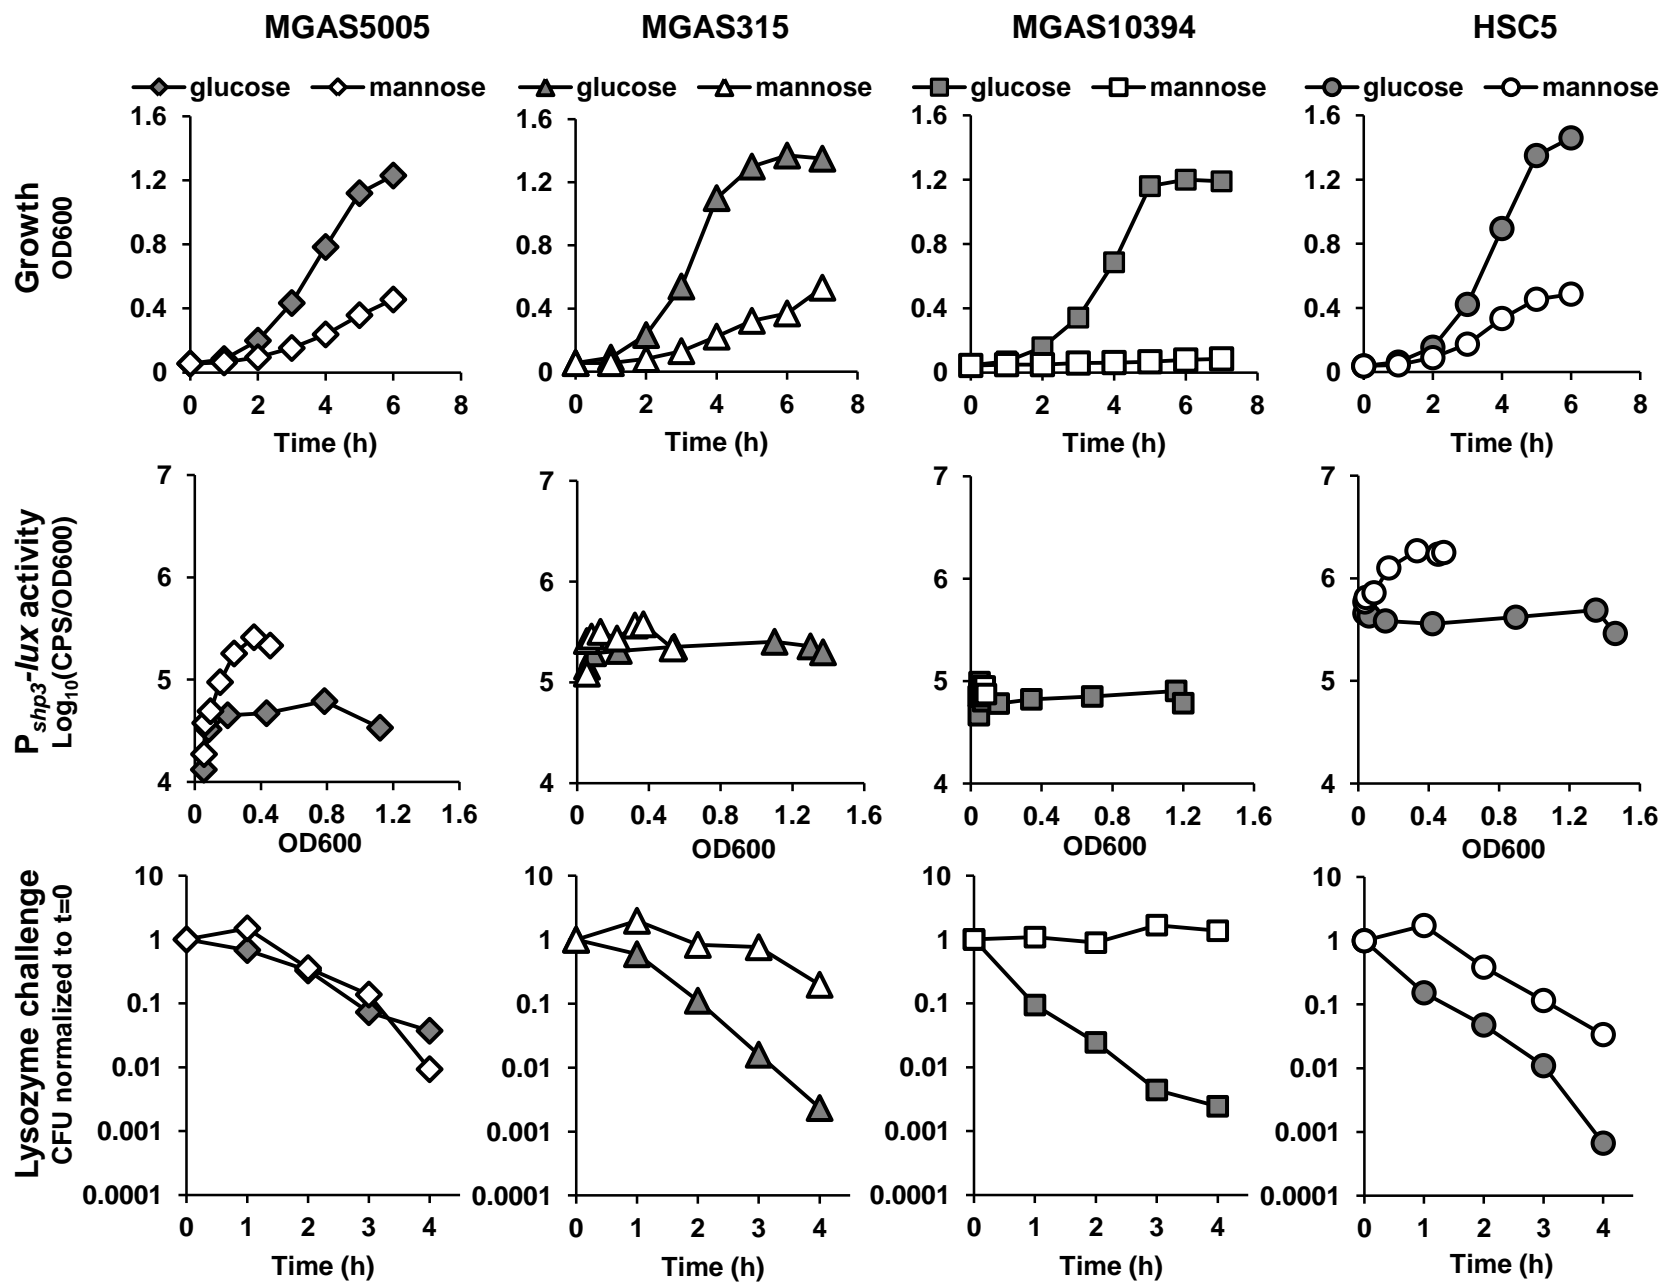

**Table S1. Effect of SHP3-C8 treatment on MICs of some antibiotics**

|                                                    | <b>+C8</b> | <b>+reverse</b> |
|----------------------------------------------------|------------|-----------------|
| <b>streptonigrin (<math>\mu\text{M}</math>)</b>    |            |                 |
| WT                                                 | 5          | 5               |
| $\Delta rgg3$                                      | 5          | 5               |
| $\Delta mtsR$                                      | 1.25       | 1.25            |
| <b>cycloserine (mg/mL)</b>                         |            |                 |
| WT                                                 | 0.5        | 0.25            |
| $\Delta rgg2$                                      | 0.25       | 0.25            |
| $\Delta rgg3$                                      | 0.5        | 0.5             |
| $shp_{GGG}$                                        | 0.5        | 0.25            |
| <b>erythromycin (<math>\mu\text{g/mL}</math>)</b>  |            |                 |
| WT                                                 | 0.031      | 0.063           |
| $\Delta rgg2$                                      | 0.063      | 0.063           |
| $\Delta rgg3$                                      | 0.031      | 0.031           |
| $shp_{GGG}$                                        | 0.031      | 0.063           |
| <b>kanamycin (<math>\mu\text{g/mL}</math>)</b>     |            |                 |
| WT                                                 | 15.63      | 250             |
| $\Delta rgg2$                                      | 125        | 125             |
| $\Delta rgg3$                                      | <7.81      | 31.25           |
| $shp_{GGG}$                                        | 15.63      | 250             |
| <b>paraquat (mM)</b>                               |            |                 |
| WT                                                 | 50         | >100            |
| $\Delta rgg2$                                      | >100       | >100            |
| $\Delta rgg3$                                      | 50         | 100             |
| $shp_{GGG}$                                        | 100        | >100            |
| <b>spectinomycin (<math>\mu\text{g/mL}</math>)</b> |            |                 |
| WT                                                 | 31.25      | 125             |
| $\Delta rgg2$                                      | 125        | 125             |
| $\Delta rgg3$                                      | 31.25      | 62.5            |
| $shp_{GGG}$                                        | 31.25      | 125             |
| <b>streptomycin (<math>\mu\text{g/mL}</math>)</b>  |            |                 |
| WT                                                 | 15.63      | 250             |
| $\Delta rgg2$                                      | 125        | 250             |
| $\Delta rgg3$                                      | 7.81       | 15.63           |
| $shp_{GGG}$                                        | 15.63      | 250             |

**Table S2. GAS growth on different carbon sources**

| <b>Carbon source</b>                  | <b>Growth<sup>a</sup></b> | <b>P<sub>shp-luxAB</sub> induction<sup>b</sup></b> |
|---------------------------------------|---------------------------|----------------------------------------------------|
| <b>Carbohydrates</b>                  |                           |                                                    |
| N-Acetyl-D-Glucosamine                | ++                        | -                                                  |
| D-Fructose                            | ++                        | -                                                  |
| α-D-Glucose                           | ++                        | +/-                                                |
| D-Glucosamine                         | ++                        | -                                                  |
| Maltose                               | ++                        | -                                                  |
| Maltotriose                           | ++                        | -                                                  |
| Sucrose                               | ++                        | -                                                  |
| D-Trehalose                           | ++                        | -                                                  |
| N-Acetyl-β-D-Mannosamine              | +                         | -                                                  |
| D-Cellobiose                          | +                         | -                                                  |
| Lactulose                             | +                         | -                                                  |
| D-Mannose                             | +                         | ++                                                 |
| 3-O-β-D-Galacto-pyranosyl-D-Arabinose | +/-                       | -                                                  |
| D-Glucose-6-Phosphate                 | +/-                       | -                                                  |
| α-D-Lactose                           | +/-                       | -                                                  |
| α-Methyl-D-Galactoside                | +/-                       | -                                                  |
| β-Methyl-D-Glucoside                  | +/-                       | -                                                  |
| <b>Amino acids and Amines</b>         |                           |                                                    |
| Phenylethyl- amine                    | ++                        | -                                                  |
| D-Alanine                             | +                         | -                                                  |
| L-Alanine                             | +                         | -                                                  |
| L-Glutamic Acid                       | +                         | -                                                  |
| L-Serine                              | +                         | -                                                  |
| L-Threonine                           | +                         | -                                                  |
| L-Asparagine                          | +/-                       | -                                                  |
| L-Aspartic Acid                       | +/-                       | -                                                  |
| L-Glutamine                           | +/-                       | -                                                  |
| Glycyl-L-Aspartic Acid                | +/-                       | -                                                  |
| Glycyl-L-Proline                      | +/-                       | -                                                  |
| L-Proline                             | +/-                       | -                                                  |
| D-Threonine                           | +/-                       | -                                                  |
| Tyramine                              | +/-                       | -                                                  |
| <b>Nucleic Bases</b>                  |                           |                                                    |
| Adenosine                             | +                         | -                                                  |
| Inosine                               | +                         | -                                                  |
| 2-Deoxy Adenosine                     | +/-                       | -                                                  |
| Uridine                               | +/-                       | -                                                  |
| <b>Organic Acids and Alcohols</b>     |                           |                                                    |
| 2-Aminoethanol                        | +                         | -                                                  |
| Dulcitol                              | +                         | -                                                  |
| Formic Acid                           | +                         | -                                                  |
| L-Galactonic Acid-γ-Lactone           | +                         | -                                                  |
| D-Gluconic Acid                       | +                         | -                                                  |
| α-Hydroxy Butyric Acid                | +                         | -                                                  |
| α-Hydroxy Glutaric Acid-γ-Lactone     | +                         | -                                                  |
| L-Lactic Acid                         | +                         | -                                                  |

|                                      |     |   |
|--------------------------------------|-----|---|
| Mono Methyl Succinate                | +   | - |
| D-Malic Acid                         | +   | - |
| L-Malic Acid                         | +   | - |
| Mucic Acid                           | +   | - |
| Propionic Acid                       | +   | - |
| Acetic Acid                          | +/- | - |
| Adonitol                             | +/- | - |
| D-Galactonic Acid- $\gamma$ -Lactone | +/- | - |
| Glycerol                             | +/- | - |
| D,L- $\alpha$ -Glycerol-Phosphate    | +/- | - |
| D,L-Malic Acid                       | +/- | - |
| D-Mannitol                           | +/- | - |
| m-Hydroxy Phenyl Acetic Acid         | +/- | - |
| p-Hydroxy Phenyl Acetic Acid         | +/- | - |
| Succinic Acid                        | +/- | - |
| m-Tartaric Acid                      | +/- | - |
| Tricarballic Acid                    | +/- | - |

<sup>a</sup>Symbols: ++ Growth of more than ten fold over initial level; + Growth of more than six fold and lower than ten fold over initial level; +/- Growth of over four fold and lower than six fold over initial level.

<sup>b</sup>Symbols: ++ Promoter induction of over 200-fold; + Promoter induction of over 50-fold times and lower than 200-fold; +/- Promoter induction of over 20-fold times and lower than 50-fold.

**Table S3. Strains and plasmids used in this study**

| <u>Strain/plasmid</u>             | <u>Description</u>                                                                                                     | <u>Reference</u>                                       |
|-----------------------------------|------------------------------------------------------------------------------------------------------------------------|--------------------------------------------------------|
| <b><i>S. pyogenes</i> strains</b> |                                                                                                                        |                                                        |
| NZ131                             | Wild-type M49 isolate                                                                                                  | (Simon & Ferretti, 1991, McShan <i>et al.</i> , 2008)  |
| $\Delta rgg2$                     | NZ131 $\Delta rgg2$ ; unmarked                                                                                         | (Chang <i>et al.</i> , 2011)                           |
| $\Delta rgg3$                     | NZ131 $\Delta rgg3::cat$ ; Cm <sup>R</sup>                                                                             | (Chang <i>et al.</i> , 2011)                           |
| <i>shp</i> <sub>GGG</sub>         | NZ131 <i>shp2</i> <sub>GGG</sub> <i>shp3</i> <sub>GGG</sub> ; unmarked                                                 | (Cook <i>et al.</i> , 2013)                            |
| $\Delta mtsR$                     | NZ131 $\Delta mtsR::aphA3$ ; Kan <sup>R</sup>                                                                          | (Bates <i>et al.</i> , 2005)                           |
| $\Delta mtsR\Delta rgg2$          | NZ131 $\Delta mtsR::aphA3 \Delta rgg2$ ; Kan <sup>R</sup>                                                              | This study, (Chang <i>et al.</i> , 2011)               |
| $\Delta mtsR\Delta rgg3$          | NZ131 $\Delta mtsR::aphA3 \Delta rgg3::cat$ ; Cm <sup>R</sup> Kan <sup>R</sup>                                         | This study, (Chang <i>et al.</i> , 2011)               |
| <i>manM</i>                       | NZ131 <i>spy49_1355::pJJ216</i> ; Kan <sup>R</sup>                                                                     | This study                                             |
| <i>ptsC</i>                       | NZ131 <i>spy49_0835::pJJ217</i> ; Kan <sup>R</sup>                                                                     | This study                                             |
| <i>agaW</i>                       | NZ131 <i>spy49_0526c::pJJ215</i> ; Kan <sup>R</sup>                                                                    | This study                                             |
| HSC5                              | Wild-type M14 isolate                                                                                                  | (Port <i>et al.</i> , 2013)                            |
| MGAS5005                          | Wild-type M1 isolate with natural <i>covS</i> mutation                                                                 | (Hoe <i>et al.</i> , 1999, Sumby <i>et al.</i> , 2006) |
| MGAS315                           | Wild-type M3 isolate                                                                                                   | (Beres <i>et al.</i> , 2002)                           |
| MGAS10394                         | Wild-type M6 isolate; Erm <sup>R</sup>                                                                                 | (Banks <i>et al.</i> , 2004)                           |
| <b><i>P. aeruginosa</i> PA14</b>  | Human clinical isolate                                                                                                 | (Rahme <i>et al.</i> , 1995)                           |
| <b>Plasmids</b>                   |                                                                                                                        |                                                        |
| p7INT                             | Shuttle-suicide vector that integrates at streptococcal bacteriophage T12 <i>attB</i> site; Erm <sup>R</sup>           | (McShan <i>et al.</i> , 1998)                          |
| pJC188                            | 524 bp DNA fragment containing the <i>rgg3</i> promoter fused to <i>luxAB</i> and cloned into p7INT; Erm <sup>R</sup>  | This study                                             |
| pJC190                            | 1046 bp DNA fragment containing the <i>rgg2</i> promoter fused to <i>luxAB</i> and cloned into p7INT; Erm <sup>R</sup> | This study                                             |
| pJC219                            | 384 bp DNA fragment containing the <i>shp3</i> promoter fused to <i>luxAB</i> and cloned into p7INT; Erm <sup>R</sup>  | (LaSarre <i>et al.</i> , 2013b)                        |

|          |                                                                                                                           |                        |
|----------|---------------------------------------------------------------------------------------------------------------------------|------------------------|
| pJC229   | 384 bp DNA fragment containing the <i>shp3</i> promoter fused to <i>luxAB</i> and cloned into pLZ12-Sp; Spec <sup>R</sup> | This study             |
| pJC303   | 125 bp DNA fragment containing the <i>recA</i> promoter cloned into pLZ12-Sp; Spec <sup>R</sup>                           | This study             |
| pJJ180   | Promoterless <i>luxAB</i> genes cloned into p7INT, Erm <sup>R</sup>                                                       | This study             |
| pJJ215   | 482 bp internal fragment of <i>agaW</i> gene cloned into pUC-Km for insertional disruption, Kan <sup>R</sup>              | This study             |
| pJJ216   | 517 bp internal fragment of <i>manM</i> gene cloned into pUC-Km for insertional disruption, Kan <sup>R</sup>              | This study             |
| pJJ217   | 430 bp internal fragment of <i>ptsC</i> gene cloned into pUC-Kan for insertional disruption, Kan <sup>R</sup>             | This study             |
| pJJ244   | 345 bp DNA fragment containing the <i>ptsA</i> promoter cloned into pJJ180 upstream of <i>luxAB</i> , Erm <sup>R</sup>    | This study             |
| pJJ252   | 460 bp DNA fragment containing the <i>manL</i> promoter cloned into pJJ180 upstream of <i>luxAB</i> , Erm <sup>R</sup>    | This study             |
| pJJ251   | <i>ptsABCD</i> operon cloned into pJC303 downstream of the P <sub>recA</sub> promoter, Spec <sup>R</sup>                  | This study             |
| pLZ12-Sp | Shuttle vector encoding spectinomycin resistance; pWV01 origin, Spec <sup>R</sup>                                         | (Husmann et al., 1995) |
| pUC-Km   | Vector with Gram-negative pMB1 origin containing the <i>aphA3</i> cassette, Kan <sup>R</sup>                              | (Menard et al., 1993)  |

**Table S4. Primers used in this study**

| <b>Primer</b> | <b>Nucleotide sequence (5' to 3')</b>      | <b>Description</b>                                                                      |
|---------------|--------------------------------------------|-----------------------------------------------------------------------------------------|
| JC148         | CATGgaattcGTTATCTCTGCTACTCTGTC             | Sense primer to clone <i>rgg3</i> promoter region; EcoRI site                           |
| JC149         | CATGgaattcATGTAGTTGTTGTTAGTTTAGCC          | Sense primer to clone <i>rgg2</i> promoter region; EcoRI site                           |
| JC159         | CAAATATTTCCAAACTTCATATTTTCCCACCTTTCCCAACA  | Antisense primer to fuse <i>rgg3</i> promoter region to <i>luxAB</i>                    |
| JC161         | CAAATATTTCCAAACTTCATTTTTCCCACCTTTACAACAAAA | Antisense primer to fuse <i>rgg2</i> promoter region to <i>luxAB</i>                    |
| JC415         | CATGgaattcAAAGAGGAGAAAGTATTGGC             | Sense primer to clone <i>recA</i> promoter; EcoRI site                                  |
| JC417         | CATGgcgccgcCCCTTACCAAATCTTTTTCAATAT        | Antisense primer to clone <i>recA</i> promoter; NotI site                               |
| JJ222         | CATGgtcgacGCAACAACCTTTACCATTAT             | Sense primer to clone internal fragment of <i>ptsC</i> gene into pUC-Kan; Sall site     |
| JJ223         | CATGgaattcCTGGTAATTTCAAATAAGCTG            | Antisense primer to clone internal fragment of <i>ptsC</i> gene into pUC-Km; EcoRI site |
| JJ224         | CATGgtcgacGTCATCCTTGGTGGTACA               | Sense primer to clone internal fragment of <i>manM</i> gene into pUC-Km; Sall site      |
| JJ225         | CATGgaattcATAGCTGCAAGAGCAAAAC              | Antisense primer to clone internal fragment of <i>manM</i> gene into pUC-Km; EcoRI site |
| JJ226         | CATGgtcgacAGCTATCTCCGAATTAGCTT             | Sense primer internal fragment of <i>agaW</i> gene into pUC-Km; Sall site               |
| JJ227         | CATGgaattcCCAATCAGTACAAAAGGAAT             | Antisense primer to internal fragment of <i>agaW</i> gene into pUC-Km; EcoRI site       |
| JJ276         | CATGgtcgacTGGAAGTGGTTATGCTATGA             | Sense primer to clone <i>manL</i> promoter; Sall site                                   |
| JJ257         | CATGgcgccgcCTCCTTTAAAATATTTTCGTTG          | Antisense primer to clone <i>manL</i> promoter; NotI site                               |
| JJ254         | CATGgtcgacTTATCGTGATGGCTATGG               | Sense primer to clone <i>ptsA</i> promoter; Sall site                                   |
| JJ255         | CATGgcgccgcCTATTAACAAAAACCGCTGA            | Antisense primer to <i>ptsA</i> promoter; NotI site                                     |
| JJ273         | CATGgcgccgcATGAAACGAAAATTTCTCATT           | Sense primer to clone <i>ptsABCD</i> ORFs into pJC303; NotI site                        |
| JJ274         | CATGagatctCTTACCTTTATTGCTAGGAGAT           | Antisense primer to clone <i>ptsABCD</i> ORFs into pJC303; BglII site                   |
